# Supplementary material for: A 30 years follow-up study in the cadmium former polluted area in Japan: the relationship between cadmium exposure and β2-microglobulin in the urine of Japanese
Source: Research Square preprint supplement (doi:10.21203/rs.3.rs-1809674/v1), 2022-07-22
Supplement: Supplementary file 1 [file 81c6f70ef8920b7b4e83ea7b.doc]

Table 1. Changes in urinary Cd concentration were adjusted by creatinine from 1986 to 2016 in females, males and combined data.

| **U-Cd/creatinine (μg/g.creatinine)** | | | | | | | | | | | |
| --- | --- | --- | --- | --- | --- | --- | --- | --- | --- | --- | --- |
| **Females n = 9** | | |  | **Males n = 11** | |  |  | **Total n = 20** | | | |
| **Year** | **GM** | **GSD** |  | **GM** | **GSD** |  |  | **GM** | **GSD** |  |  |
| **1986** | 8.031 | 1.902 |  | 5.770 | 1.410 | P = 0.005 |  | 6.696 | 1.673 | P < 0.0001 | P = 0.03 |
| **1991** | 8.420 | 1.942 |  | 4.499 | 1.515 |  |  | 5.966 | 1.850 |  |  |
| **1999** | 4.788 | 2.178 |  | 3.178 | 1.464 |  |  | 3.822 | 1.845 |  |  |
| **2003** | 4.903 | 1.882 |  | 3.367 | 1.797 | P = 0.029 |  | 3.989 | 1.861 | P = 0.001 |  |
| **2008** | 3.617 | 1.654 |  | 2.360 | 1.767 |  |  | 2.860 | 1.768 |  |  |
| **2014** | 5.169 | 1.659 |  | 4.097 | 1.574 |  |  | 4.548 | 1.616 |  |  |
| **2016** | 5.677 | 1.567 |  | 4.241 | 1.599 |  |  | 4.836 | 1.604 |  |  |
|  |  |  |  |  |  |  |  |  |  |  |  |

GM: Geometric Mean, GSD: Geometric Standard Deviation, p: p-value

Table 2. Changes in urinary β2-MG concentrations were adjusted by creatinine from 1986 to 2016 in females, males and combined data.

| **β2-MG/creatinine (μg/g.creatinine)** | | | | | | | | | | | | | | |  |
| --- | --- | --- | --- | --- | --- | --- | --- | --- | --- | --- | --- | --- | --- | --- | --- |
| **Females n = 9** | | |  | **Males n = 11** | | |  |  | **Total n = 20** | | | |  | | |
| **Year** | **GM** | **GSD** |  | **GM** | **GSD** | |  |  | **GM** | **GSD** |  |  | |  | |
| **1986** | 159.4 | 8.508 |  | 60.67 | P = 0.035  7.004 | |  |  | 93.69 | 7.702 | P = 0.009  P = 0.034 |  | |  | |
| **1991** | 390.4 | 4.029 |  | 81.35 | 2.496 | P = 0.01 | |  | 164.8 | 3.968 |  |  | |  | |
| **1999** | 227.4 | 16.77 |  | 14.87 | 7.349 | P = 0.015  P = 0.004 | |  | 50.73 | 15.13 | P = 0.008  P = 0.006 |  | |  | |
| **2003** | 422.9 | 5.505 |  | 101.5 | 3.912 |  | |  | 192.9 | 5.227 |  |  | |  | |
| **2008** | 1158.9 | 10.67 |  | 173.7 | 4.279 | P = 0.006 | |  | 408.1 | 8.167 | P = 0.011 |  | |  | |
| **2014** | 1149.4 | 17.07 |  | 271.5 | 7.916 | P = 0.003 | |  | 519.8 | 12.03 | P = 0.002 |  | |  | |
| **2016** | 1923.9 | 11.83 |  | 434.03 | 7.451 |  | |  | 848.3 | 9.932 | P = 0.041 |  | |  | |

GM: Geometric Mean, GSD: Geometric Standard Deviation, p: p-value

| Table 3.　Simple correlation coefficients between urinary Cd and β2-MG concentrations adjusted for creatinine in males and females from 1986 to 2016. | | | | | | | | | | | | | |
| --- | --- | --- | --- | --- | --- | --- | --- | --- | --- | --- | --- | --- | --- |
|
|
|
|  |  | |  | |  |  |  | |  | |  | | |
|  | | **Females (n= 9)** | | | | **Males (n= 11)** | | | | **Total (n=20)** | | |  |
| **r** | | **p** | | **r** | | **p** | | **r** | | **p** |  |
| **1986** | | 0.764a | | 0.016 | | 0.253a | | 0.453 | | 0.586a | | 0.007 |  |
| **1991** | | 0.652a | | 0.057 | | -0.043a | | 0.900 | | 0.558b | | 0.011 |  |
| **1999** | | 0.332a | | 0.382 | | 0.329a | | 0.322 | | -0.005a | | 0.053 |  |
| **2003** | | 0.694a | | 0.038 | | 0.323a | | 0.333 | | 0.575a | | 0.008 |  |
| **2008** | | 0.678a | | 0.045 | | 0.688a | | 0.019 | | 0.705b | | 0.005 |  |
| **2014** | | 0.539a | | 0.134 | | 0.524a | | 0.098 | | 0.563a | | 0.009 |  |
| **2016** | | 0.634a | | 0.067 | | 0.336b | | 0.312 | | 0.462b | | 0.041 |  |
| r: correlation coefficient(a: Pearson correlation, b: Spearman correlation), p: p-value | | | | | | | | | | | | |  |

Table 4. The association among urinary β2-MG adjusted by creatinine and age, urinary cadmium adjusted by creatinine concentration, sex from 1986 to 2016 using multiple regression analysis.

|  | **1986** | | | **1991** | | | **1999** | | | **2003** | | | **2008** | | | **2014** | | | **2016** | | |
| --- | --- | --- | --- | --- | --- | --- | --- | --- | --- | --- | --- | --- | --- | --- | --- | --- | --- | --- | --- | --- | --- |
|  | **β** | **P** | **R2** | **β** | **P** | **R2** | **β** | **P** | **R2** | **β** | **P** | **R2** | **β** | **P** | **R2** | **β** | **P** | **R2** | **β** | **P** | **R2** |
| **Age** | 0.298 | 0.171 |  | 0.224 | 0.286 |  | 0.263 | 0.210 |  | 0.449 | 0.044 |  | 0.393 | 0.041 |  | 0.559 | 0.031 |  | 0.559 | 0.013 |  |
| **U-Cd/creatinine** | 0.442 | 0.062 | 0.420 | 0.273 | 0.267 | 0.491 | 0.219 | 0.319 | 0.405 | 0.216 | 0.331 | 0.543 | 0.390 | 0.058 | 0.654 | 0.133 | 0.591 | 0.514 | 0.166 | 0.443 | 0.542 |
| **sex** | 0.080 | 0.695 |  | 0.427 | 0.063 |  | 0.424 | 0.056 |  | 0.349 | 0.069 |  | 0.291 | 0.091 |  | 0.233 | 0.218 |  | 0.249 | 0.186 |  |

β: standardized coefficients; p: p-value; R2: coefficient of determination
